# Supplementary material for: The Effect of Orally Administered Δ9-Tetrahydrocannabinol (THC) and Cannabidiol (CBD) on Obesity Parameters in Mice
Source: MDPI journal article supplement (doi:10.3390/ijms241813797), 2023-09-07
Supplement: s1 [file s1]

## Supplementary Information

### Effect of orally administered $\Delta^9$ -Tetrahydrocannabinol (THC) and cannabidiol (CBD) on obesity parameters in mice

Adi Eitan, Ofer Gover, Liron Sulimani, David Meiri, and Betty Schwartz

**Table S1: Fatty acid composition of the STD and HFD used in this study**

|                            | HFD   | STD  |
|----------------------------|-------|------|
| Total fat (g/kg)           | 342.7 | 62   |
| Saturated fat (g/kg)       | 119.2 | 0.63 |
| C14:0 myristic             | 3.1   | -    |
| C16:0 Palmitic             | 74.6  | 0.49 |
| C18:0 Stearic              | 41.5  | 0.14 |
| Monounsaturated fat (g/kg) | 134   | 9.1  |
| C16:1 Palmitoleic          | 6.2   | -    |
| C18:1 Oleic                | 127.8 | 8.4  |
| Polyunsaturated fat (g/kg) | 77.2  | 23.8 |
| C18:2 Linoleic             | 71.7  | 21.7 |
| C18:3 Linolenic            | 5.5   | 0.21 |
| $\omega 6:\omega 3$ ration | 13    | 10   |

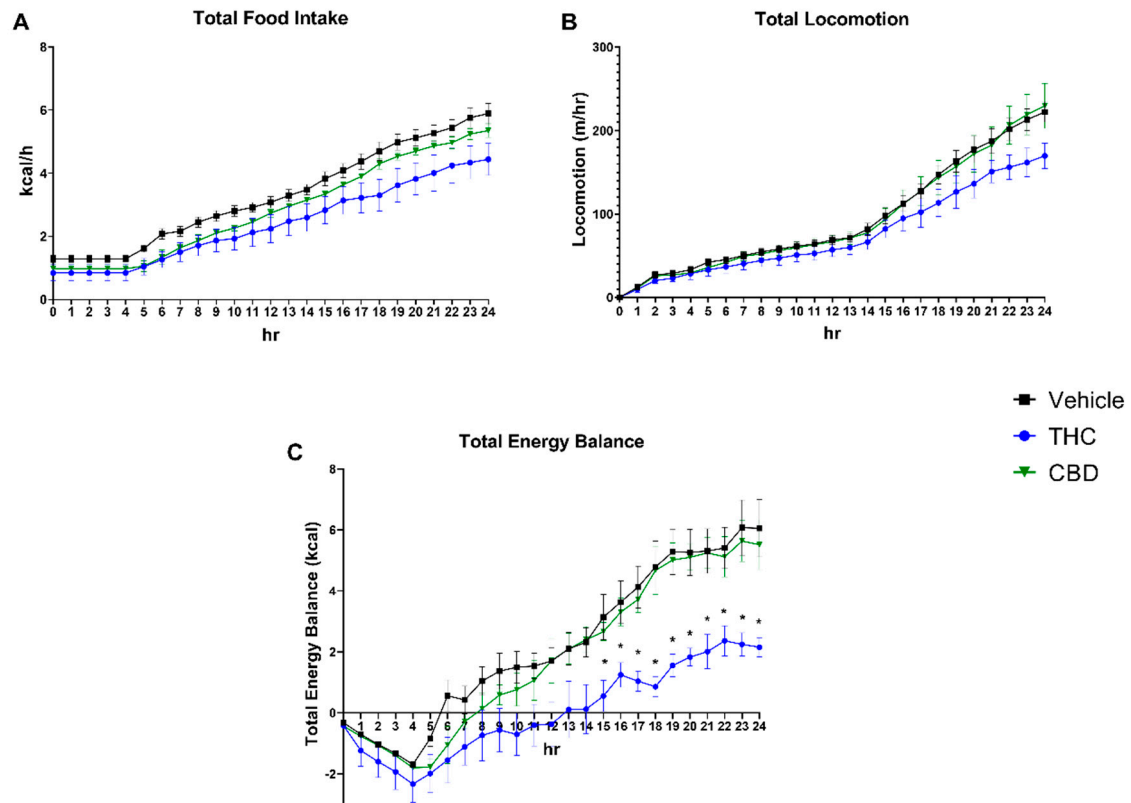

**Figure S1: Food intake, locomotion, and energy balance after single dose of 30 mg/kg of THC and CBD.** Mice were treated with vehicle, THC (30 mg/kg), or CBD (30 mg/kg) and placed in metabolic cages for 24 hours. (A) accumulative food intake, (B) accumulative locomotion, and (C) accumulative energy balance were assessed. Data are shown as mean  $\pm$  SEM with  $n=4$  mice per group. Statistical significance was determined by two-way ANOVA followed by Tukey's post hoc test. \*  $p<0.05$

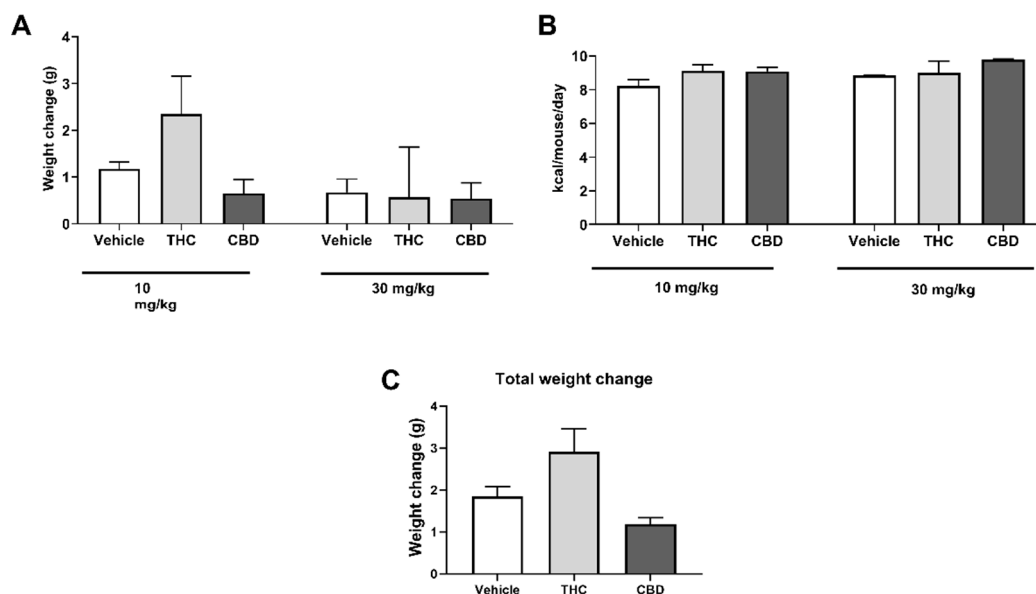

**Figure S2: Effect of THC and CBD on weight gain and caloric intake in mice fed standard diet.** Weight and food consumption were measured twice a week during the course of the treatment regime. A. Body weight change of mice fed chow diet after 5-week treatment with 10 mg/kg or 30 mg/kg of THC, CBD, or vehicle (n=5), B. Average caloric intake of mice fed a chow diet and treated with 10 mg/kg or 30 mg/kg of THC, CBD, or vehicle (n=5), C. Total weight change of the treatment regime.

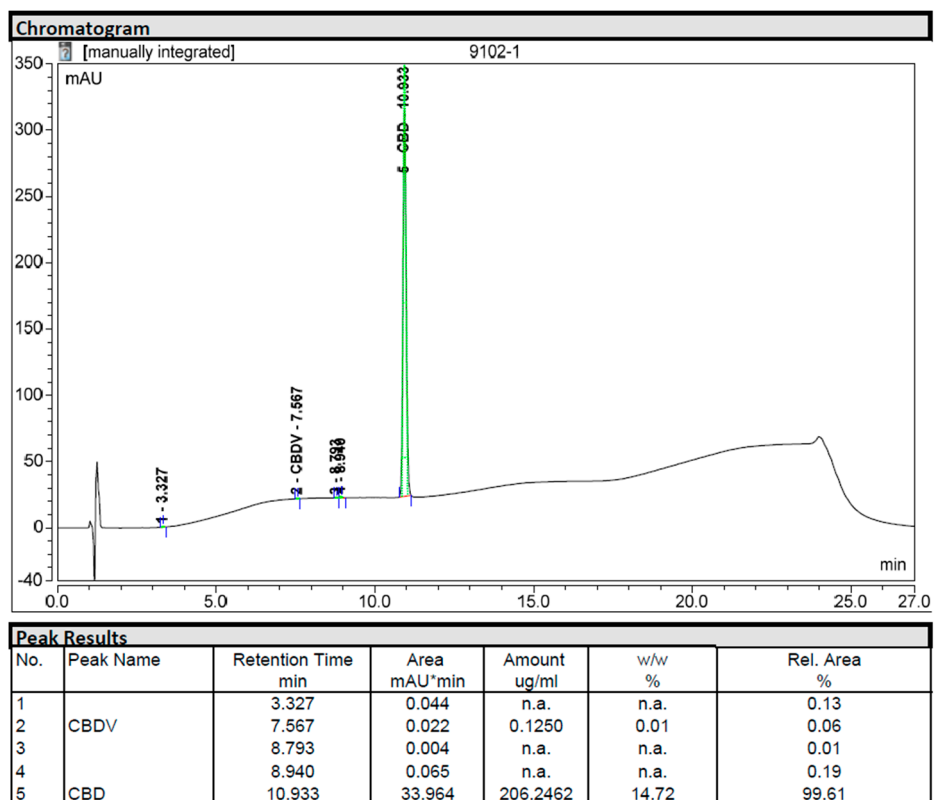

**Figure S3: HPLC chromatogram of CBD extract.** Identification of CBD according to analytic standard by LC/HRMS/MS as described in the materials and methods.

**Table S2: Primer list**

| Gene           | Forward primer          | Accession number |
|----------------|-------------------------|------------------|
|                | Reverse primer          |                  |
| F4/80          | CCTTTGGCTATGGGCTTCCA    | NM_001355722.1   |
|                | CCTCAGAACCCACAGTGTCC    |                  |
| TNF- $\alpha$  | GTCTGTGCCTCAGCCTCTTC    | NM_013693.3      |
|                | GCTTGGTGGTTTGCTACGAC    |                  |
| MCP-1          | GCTGTAGTTTTTGTACCAAGC   | NM_011333        |
|                | GTGCTGAAGACCTTAGGGCA    |                  |
| CD14           | CTGAAGCCTTCTCGGAGCC     | NM_009841.4      |
|                | GCATAAGCTTCATGGTCGGTAGA |                  |
| FASN           | GTGATAGCCGGTATGTCGGG    | NM_007988.3      |
|                | TAGAGCCCAGCCTTCCATCT    |                  |
| FADS2          | TTACCAAATGGTCCCAGCGG    | NM_019699.2      |
|                | GCTTCAAGAACTTGCCACG     |                  |
| SCD-1          | CCAAGCTGGAGTACGTCTGG    | NM_009127.4      |
|                | CAGAGCGCTGGTCATGTAGT    |                  |
| CD36           | GCAAAACGACTGCAGGTCAA    | NM_001159558.1   |
|                | GGCCATCTCTACCATGCCAA    |                  |
| FATP1          | CAGATCGGCGAGTTCTACGG    | NM_001357182.1   |
|                | TGACCTTGACCAGACGGATG    |                  |
| PPAR- $\alpha$ | CCTCAGGGTACCACTACGGA    | NM_001113418.1   |
|                | AGCGAATTGCATTGTGTGACAT  |                  |
| ACOX1          | AGTCAAAGGCATCCACCAAAG   | NM_001271898.1   |
|                | CTATGGGATCAGCCAGAAAGG   |                  |
| CPT1 $\alpha$  | GTCTGGCTCTACCATGACGG    | NM_013495.2      |
|                | CGTGCAAATAGGTCTGCCG     |                  |
| FATP2          | TGAATGTGTATGGCGTGCCT    | NM_011978.2      |
|                | AGGTACTCCGGATGTGTTG     |                  |
| FATP5          | GCCTCTGAGGGACAAACAGG    | NM_009512.2      |
|                | TCCTACGCGTCGTACATTCG    |                  |
